# Supplementary material for: Paxillin mediates extranuclear and intranuclear signaling in prostate cancer proliferation
Source: JCI journal article supplement (doi:10.1172/jci62044), 2012-06-11
Supplement: sd1 [file 1]

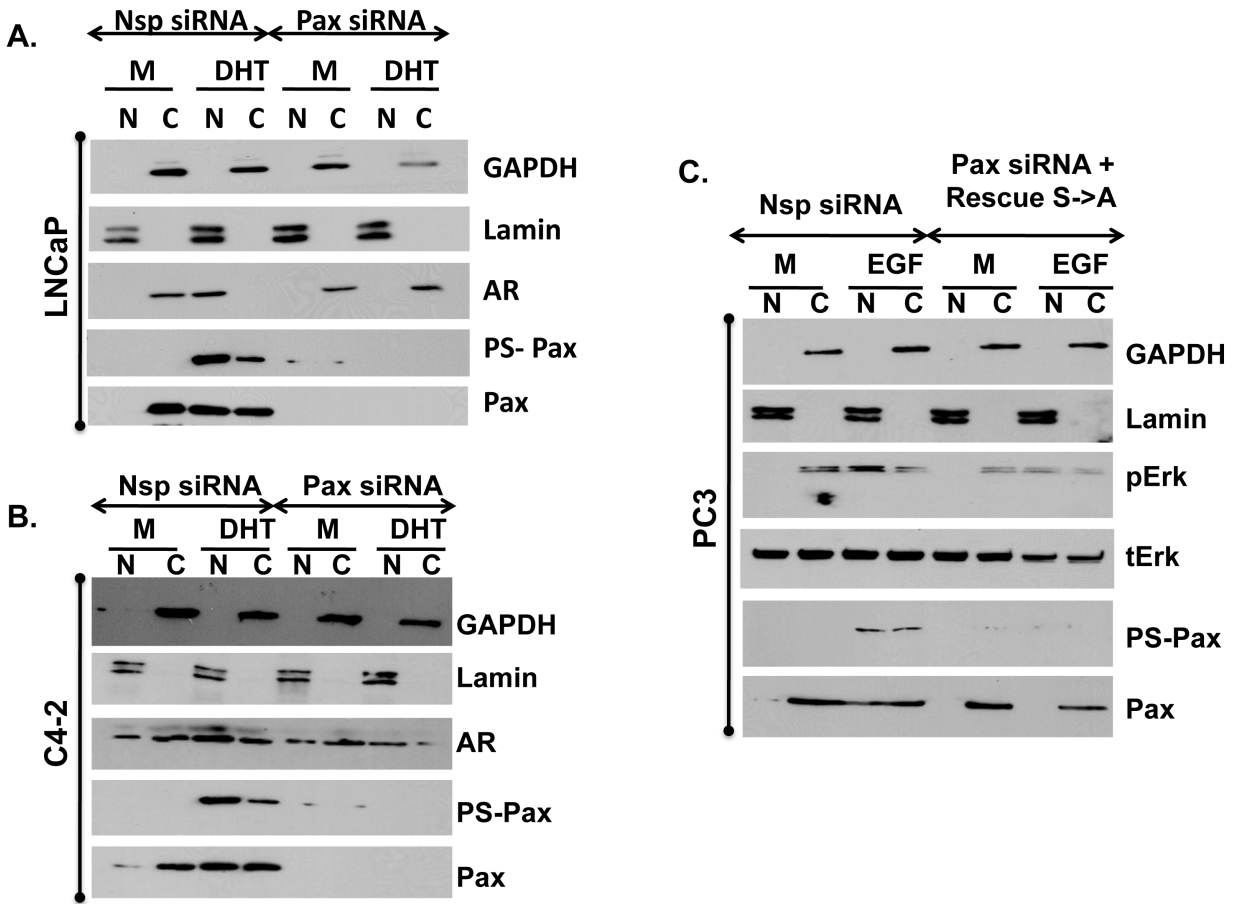

**Supplemental Figure 1S. (A and B)** Representative immunoblots depicting expression of paxillin, phosphoserine-126 paxillin (PS-Paxillin) and androgen receptor (AR) in nuclear (N) and cytoplasmic (C) fractions of LNCaP (**A**) and C4-2 (**B**) cells treated with non-specific (Nsp) or paxillin (Pax)-specific siRNA and stimulated with media or DHT (25nM, 30 minutes). (**C**) Representative immunoblots depicting expression of paxillin, phosphoserine-126 paxillin (PS-Paxillin), total Erk (tErk) and activated Erk (pErk1/2) in nuclear (N) and cytoplasmic (C) fractions of PC3 cells treated with non-specific (Nsp) or paxillin (Pax) siRNA, followed by transfection with the paxillin mutant lacking the MAPK-targeted serine (83, 126 and 130) residues (S->A), followed by stimulation with media or EGF (20ng/ml, 30 minutes). Expression of GAPDH and Lamin are used as cytoplasmic and nuclear controls, respectively. Each experiment was repeated three times with same results.

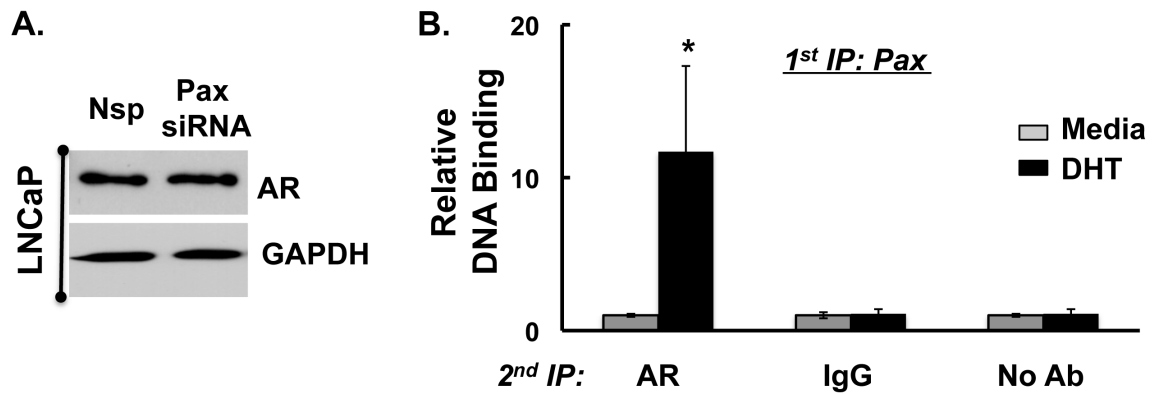

**Supplemental Figure 2S.** (A) Representative immunoblots depicting expression of androgen receptor (AR) protein level in LNCaP cells treated with non-specific (Nsp) or paxillin (Pax)-specific siRNA. (B) *ChIP re-ChIP assay*. Cells were serum starved overnight followed by media or DHT (25nM; 45 mins) treatment. ChIP re-ChIP assays were performed for the PSA promoter region with paxillin as the first antibody (Ab) and AR as the second antibody. Data are represented as relative DNA Binding. \*P ≤ 0.005 with respect to media.

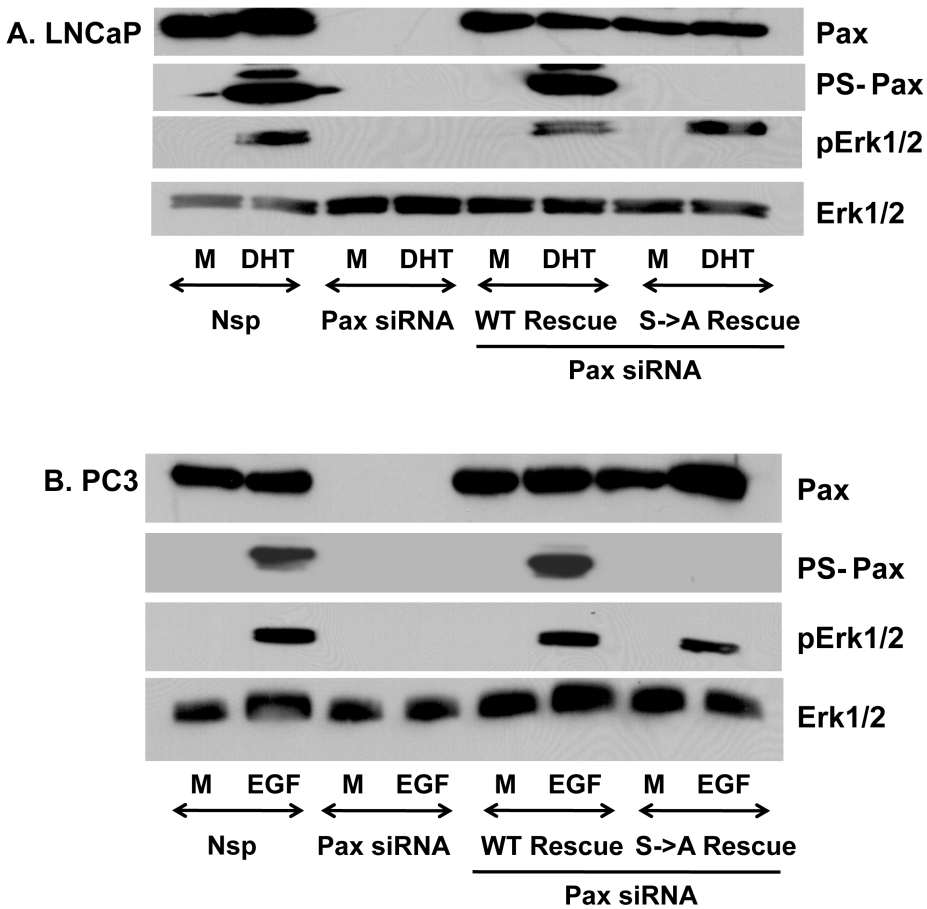

**Supplemental Figure 3S. (A and B)** Immunoblots depicting expression of paxillin, phosphoserine-126 paxillin (PS-Paxillin), Erk1/2, and activated Erk (pErk1/2) in LNCaP (**A**) and PC3 (**B**) cells treated with non-specific (Nsp) or paxillin (Pax)-specific siRNA, or in paxillin knockdown LNCaP/PC3 cells transfected with wild-type (WT) paxillin or paxillin mutants lacking the MAPK-targeted serine residues (S->A). Cells are treated with media or DHT (25nM, 30 minutes) for LNCaP and media or EGF (20ng/ml, 30 minutes) for PC3 cells.
